# Supplementary material for: High-efficiency hybrid solar cells by nanostructural modification in PEDOT:PSS with co-solvent addition
Source: Royal Society of Chemistry journal article supplement (doi:10.1039/c3ta14590e), 2013-12-02
Supplement: c3ta14590e.pdf [file c3ta14590e.pdf]

**Supporting Information**

**High-efficiency hybrid solar cells by nanostructural modification in  
PEDOT:PSS with co-solvent addition**

**Joseph Palathinkal Thomas,<sup>a</sup> Liyan Zhao,<sup>a</sup> Donald McGillivray,<sup>a</sup> and Kam Tong Leung<sup>\*a</sup>**

<sup>a</sup>*WATLab and Department of Chemistry, University of Waterloo, Waterloo, Ontario, N2L3G1, Canada;*

<sup>\*</sup>*E-mail: tong@uwaterloo.ca*

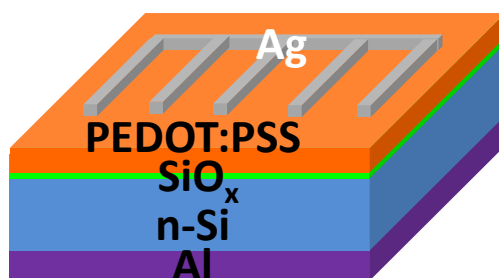

**Scheme S1.** Schematic diagram of the device structure of the hybrid solar cell used in the present work.

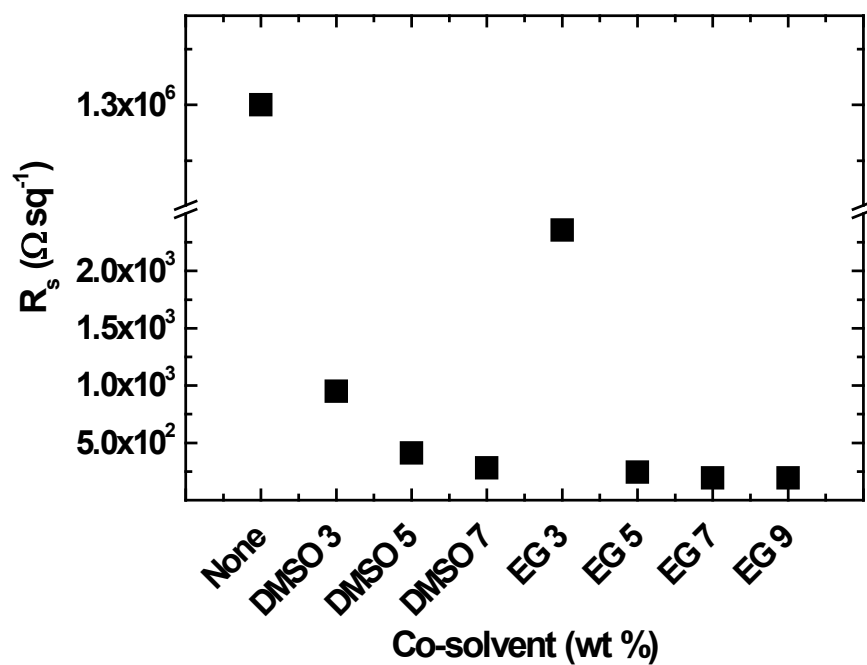

**Figure S1.** Sheet resistance ( $R_s$ ) variation with and without the addition of co-solvents in PEDOT:PSS film spin-coated on glass substrates.

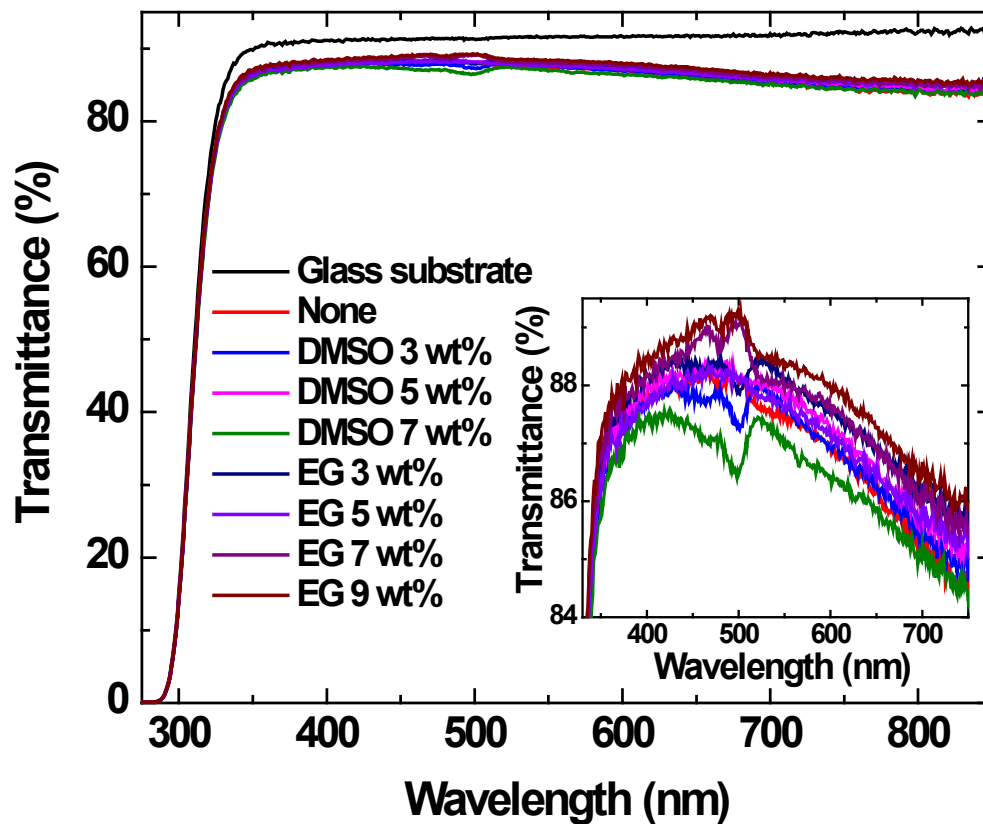

**Figure S2.** Transmittance spectra of PEDOT:PSS films on glass substrates in the UV-Vis range (Perkin Elmer 1050). The transmittance spectrum of a glass substrate is also shown in the figure for comparison. The inset shows an enlarged view of the transmittance spectra of PEDOT:PSS films.

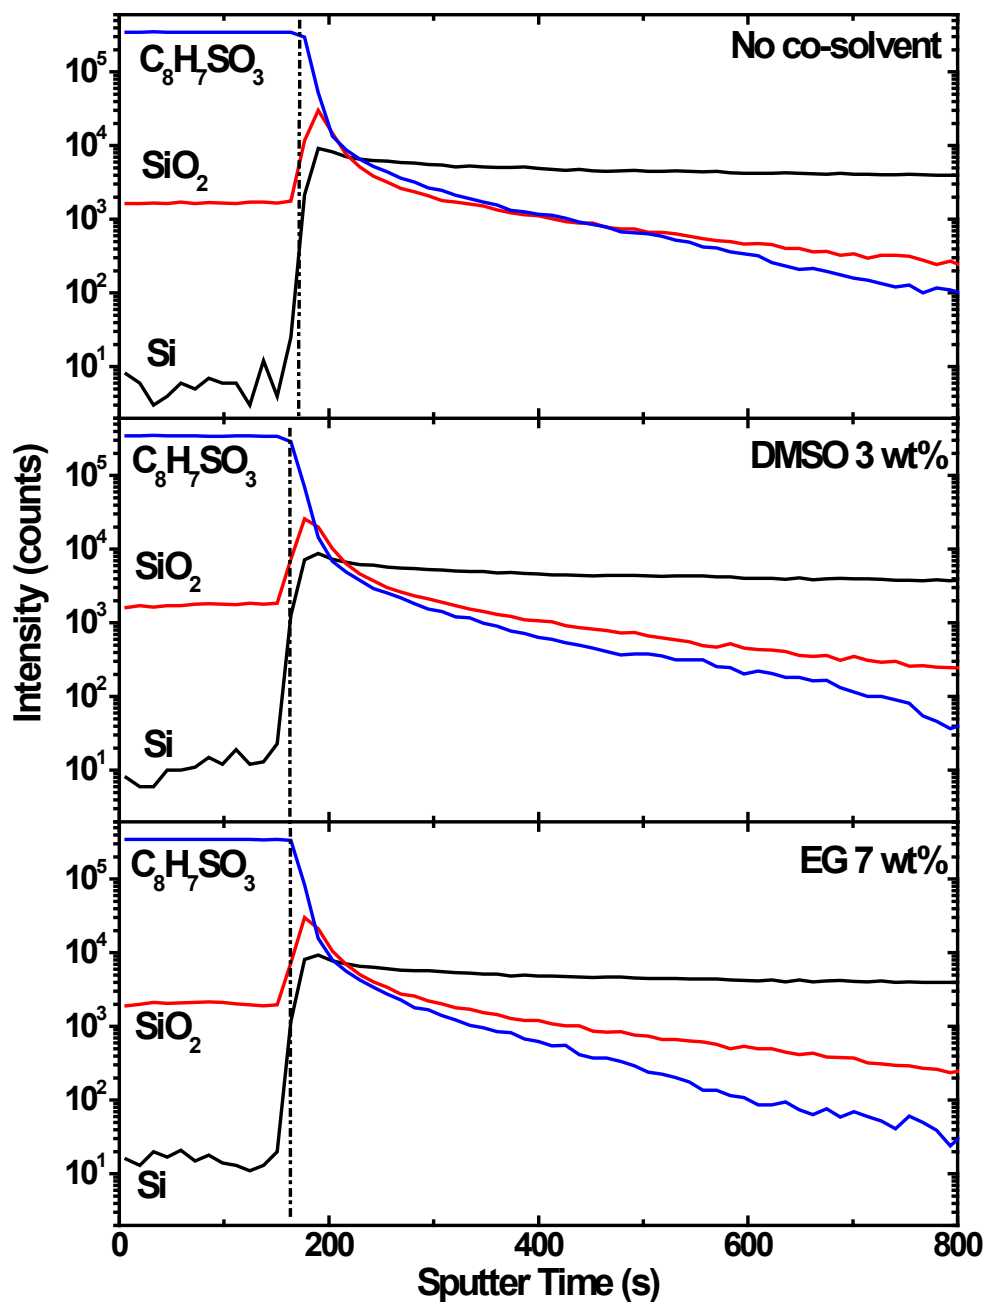

**Figure S3.** TOF-SIMS depth profiles (negative polarity mode) of PEDOT:PSS spin-coated on Si substrate before and after the addition of 3 wt% DMSO and 7 wt% EG. The dotted lines mark the interface between PEDOT:PSS and Si, which indicates a slight variation in the sputtering time to reach the interface due to the difference in film thickness after the addition of co-solvents.

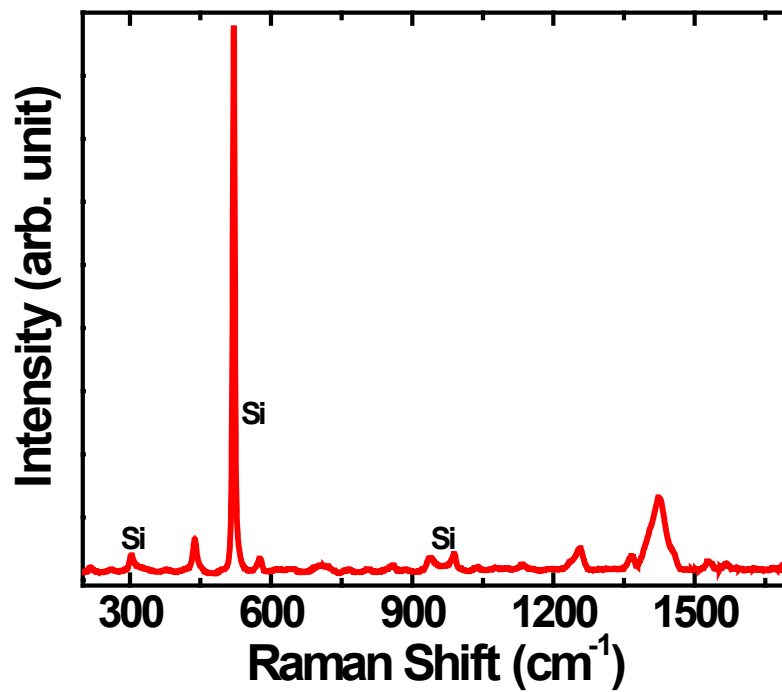

**Figure S4.** Raman spectra of PEDOT:PSS film spin-coated on Si substrate. The Si (substrate) features are marked.

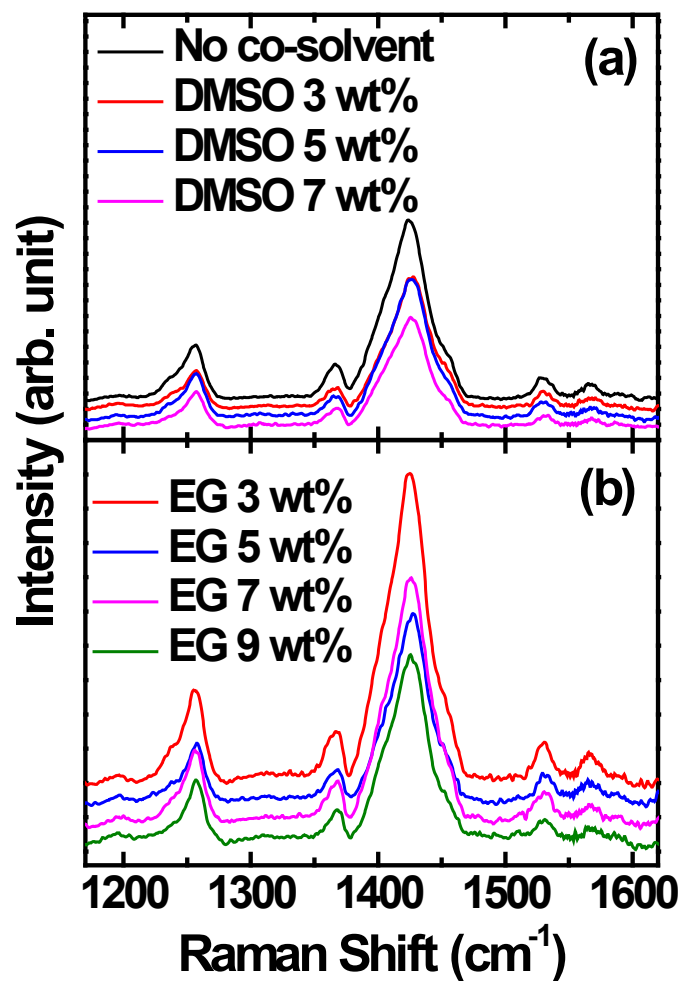

**Figure S5.** Raman spectra of PEDOT:PSS films spin-coated on Si substrates (a) before and after the addition of 3 to 7 wt% of DMSO and (b) of 3 to 9 wt% of EG in the range of 1170-1620 cm<sup>-1</sup>

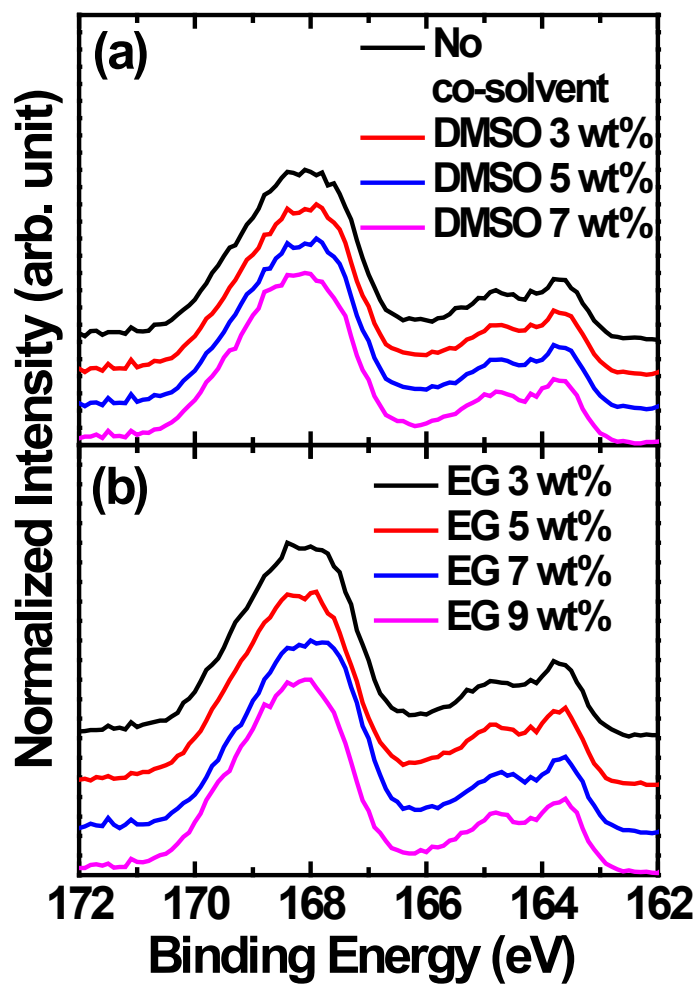

**Figure S6.** XPS spectra of the S 2p region of PEDOT:PSS films spin-coated on Si substrates (a) before and after the addition of 3 to 7 wt% of DMSO and (b) of 3 to 9 wt% of EG.
